# Supplementary material for: Antimony-doped enhanced photoluminescence quantum yield in zero-dimensional lead-free metal halide Rb2CsBiCl6 crystals
Source: Royal Society of Chemistry journal article supplement (doi:10.1039/d2qi01867e), 2022-01-01
Supplement: d2qi01867e1.pdf [file d2qi01867e1.pdf]

# **Antimony-Doping Enhanced Photoluminescence Quantum Yield in Zero-Dimensional Lead-Free Metal Halide $\text{Rb}_2\text{CsBiCl}_6$ Crystals**

Zhen Jia<sup>\*a</sup>, Pifu Gong<sup>b</sup>, Jing Zhao<sup>c</sup>, Mingxing Chen<sup>d</sup>, Yonggang Wang<sup>e</sup>, Zhigang Wang<sup>a</sup>, Yan Dong<sup>a</sup>, and Mingjun Xia<sup>\*b</sup>

<sup>a</sup>College of Chemistry and Chemical Engineering, Dezhou University, Dezhou 253023, China. E-mail: jiazhen@mail.ipc.ac.cn

<sup>b</sup>Beijing Center for Crystal Research and Development, Key Laboratory of Functional Crystals and Laser Technology, Technical Institute of Physics and Chemistry, Chinese Academy of Sciences, Beijing 100190, China. E-mail: xiamingjun@mail.ipc.ac.cn

<sup>c</sup>School of Materials Sciences and Engineering, University of Science and Technology Beijing, Beijing 100083, China

<sup>d</sup>Analytical Instrumentation Center of Peking University, Peking University, Beijing 100871, China

<sup>e</sup>School of Materials Science and Engineering, Peking University, Beijing 100871, China

## Index

|                                                                                                                                                                                                                                    |    |
|------------------------------------------------------------------------------------------------------------------------------------------------------------------------------------------------------------------------------------|----|
| Table S1. Crystallographic and structure refinement data of $\text{Rb}_2\text{CsBiCl}_6$ at RT. ....                                                                                                                               | 1  |
| Table S2. Atomic coordinates of $\text{Rb}_2\text{CsBiCl}_6$ measured at RT. ....                                                                                                                                                  | 2  |
| Table S3. Selected bond lengths ( $\text{\AA}$ ) of $\text{Rb}_2\text{CsBiCl}_6$ measured at RT. ....                                                                                                                              | 3  |
| Table S4. Selected bond angles ( $^\circ$ ) of $\text{Rb}_2\text{CsBiCl}_6$ measured at RT. ....                                                                                                                                   | 4  |
| Table S5. Molar ratios of $M_{\text{Sb}^{3+}}/M_{(\text{Sb}^{3+}+\text{Bi}^{3+})}$ in solutions and in $\text{Rb}_2\text{CsBiCl}_6:\text{Sb}^{3+}$ single crystals, respectively. ....                                             | 5  |
| Table S6. Crystallographic and structure refinement data of $\text{Rb}_2\text{CsBiCl}_6$ at 100 K. ....                                                                                                                            | 6  |
| Table S7. Cell parameters of $\text{Rb}_2\text{CsBiCl}_6$ measured at 293(2) K and 100 K, respectively. ....                                                                                                                       | 7  |
| Figure S1. Thermal analysis curve of $\text{Rb}_2\text{CsBiCl}_6$ . ....                                                                                                                                                           | 8  |
| Figure S2. Calculated and experimental powder XRD patterns of undoped and $\text{Sb}^{3+}$ -doped $\text{Rb}_2\text{CsBiCl}_6$ (with $M_{\text{Sb}^{3+}}/M_{(\text{Bi}^{3+}+\text{Sb}^{3+})}$ less than 30% in solutions). ....    | 9  |
| Figure S3. Calculated and experimental powder XRD patterns of undoped and $\text{Sb}^{3+}$ -doped $\text{Rb}_2\text{CsBiCl}_6$ (with $M_{\text{Sb}^{3+}}/M_{(\text{Bi}^{3+}+\text{Sb}^{3+})}$ greater than 30% in solutions). .... | 10 |
| Figure S4. Photograph of crystals grown in a solution with $M_{\text{Sb}^{3+}}/M_{(\text{Bi}^{3+}+\text{Sb}^{3+})}$ of 40%. ....                                                                                                   | 11 |
| Figure S5. (a) Tauc plots of $\text{Rb}_2\text{CsBiCl}_6$ , and (b) $\text{Rb}_2\text{CsBiCl}_6:\text{Sb}^{3+}$ samples. ....                                                                                                      | 12 |
| Figure S6. Excitation and emission spectra of the $\text{Rb}_2\text{CsBiCl}_6$ . ....                                                                                                                                              | 13 |
| Figure S7. Calculated CIE chromaticity coordinates of $\text{Sb}^{3+}$ -doping $\text{Rb}_2\text{CsBiCl}_6$ . ....                                                                                                                 | 14 |
| Figure S8. Normalized temperature-dependent emission spectra. ....                                                                                                                                                                 | 15 |
| Figure S9. Calculated band gap and PDOS for undoped and $\text{Sb}^{3+}$ -doped $\text{Rb}_2\text{CsBiCl}_6$ . ....                                                                                                                | 16 |

**Table S1.** Crystallographic and structure refinement data of Rb<sub>2</sub>CsBiCl<sub>6</sub> at RT.

|                                                                                                                      |                                                                     |
|----------------------------------------------------------------------------------------------------------------------|---------------------------------------------------------------------|
| Empirical formula                                                                                                    | Rb <sub>2</sub> CsBiCl <sub>6</sub>                                 |
| Formula weight                                                                                                       | 725.53                                                              |
| Crystal system                                                                                                       | orthorhombic                                                        |
| Space group                                                                                                          | <i>Pbcm</i>                                                         |
| Cell dimensions/Å                                                                                                    | <i>a</i> = 8.1044(4), <i>b</i> = 12.9295(6), <i>c</i> = 25.8508(10) |
| Cell parameters /°                                                                                                   | $\alpha = \beta = \gamma = 90.00$                                   |
| <i>Z</i>                                                                                                             | 8                                                                   |
| Cell Volume/Å <sup>3</sup>                                                                                           | 2708.8(2)                                                           |
| Calculated density (g/cm <sup>3</sup> )                                                                              | 3.55789                                                             |
| Color                                                                                                                | colorless                                                           |
| F(000)                                                                                                               | 2512                                                                |
| $\mu/\text{mm}^{-1}$                                                                                                 | 23.936                                                              |
| Data collection range/deg                                                                                            | 2.51 < $\theta$ < 30.85                                             |
| Index ranges                                                                                                         | -10 ≤ <i>h</i> ≤ 10, -14 ≤ <i>k</i> ≤ 18, -36 ≤ <i>l</i> ≤ 30       |
| Data/restraints/parameters                                                                                           | 3551/0/96                                                           |
| GOF( <i>F</i> <sup>2</sup> )                                                                                         | 1.039                                                               |
| Final <i>R</i> indices [ <i>F</i> <sub>o</sub> <sup>2</sup> > 2σ( <i>F</i> <sub>c</sub> <sup>2</sup> )] <sup>a</sup> | <i>R</i> <sub>1</sub> = 0.0361, <i>wR</i> <sub>2</sub> = 0.0862     |
| Final <i>R</i> indices (all data) <sup>a</sup>                                                                       | <i>R</i> <sub>1</sub> = 0.0495, <i>wR</i> <sub>2</sub> = 0.0904     |

$$^a R_1 = \sum_2 \frac{\left| |F_o| - |F_c| \right|}{\sum |F_o|} \text{ and } wR_2 = \left[ \frac{\sum w(F_o^2 - F_c^2)}{\sum wF_o^4} \right]^{1/2} \text{ for } F_o^2 > 2\sigma(F_c^2)$$

**Table S2.** Atomic coordinates of Rb<sub>2</sub>CsBiCl<sub>6</sub> measured at RT.

| Atom | Wyckoff | <i>S.O.F.</i> | <i>x/a</i>  | <i>y/b</i>   | <i>z/c</i> |
|------|---------|---------------|-------------|--------------|------------|
| Rb1  | 8e      | 1             | 0.19039(9)  | -0.09342(5)  | 0.65514(3) |
| Rb2  | 8e      | 1             | 0.31539(10) | 0.25515(6)   | 0.66207(3) |
| Cs1  | 8e      | 1             | 0.76108(8)  | 0.08664(4)   | 0.54998(2) |
| Bi1  | 4c      | 2             | 0.28213(4)  | 1/4          | 1/2        |
| Bi2  | 4d      | m             | 0.75582(5)  | 0.08114(3)   | 3/4        |
| Cl1  | 4d      | m             | 0.8998(4)   | -0.10851(19) | 3/4        |
| Cl2  | 4d      | m             | 0.6144(4)   | 0.27275(19)  | 3/4        |
| Cl3  | 8e      | 1             | 0.5272(3)   | 0.17456(16)  | 0.43926(7) |
| Cl4  | 8e      | 1             | 0.2724(3)   | 0.08152(14)  | 0.55966(8) |
| Cl5  | 8e      | 1             | 0.9598(3)   | 0.13932(18)  | 0.67229(8) |
| Cl6  | 8e      | 1             | 0.5503(3)   | 0.02172(17)  | 0.67445(8) |
| Cl7  | 8e      | 1             | 0.0497(3)   | 0.16218(15)  | 0.43954(8) |

**Table S3.** Selected bond lengths (Å) of Rb<sub>2</sub>CsBiCl<sub>6</sub> measured at RT.

|              |            |              |            |
|--------------|------------|--------------|------------|
| Rb1-Cl1 (x1) | 3.406(2)   | Rb1-Cl2 (x1) | 3.393(2)   |
| Rb1-Cl3 (x1) | 3.506(2)   | Rb1-Cl4 (x1) | 3.413(2)   |
| Rb1-Cl5 (x1) | 3.570(3)   | Rb1-Cl5 (x1) | 3.690(3)   |
| Rb1-Cl6 (x1) | 3.313(2)   | Rb1-Cl7 (x1) | 3.251(2)   |
| Rb2-Cl1 (x1) | 3.364(2)   | Rb2-Cl2 (x1) | 3.330(2)   |
| Rb2-Cl3 (x1) | 3.261(2)   | Rb2-Cl4 (x1) | 3.488(2)   |
| Rb2-Cl5 (x1) | 3.259(2)   | Rb2-Cl6 (x1) | 3.583(3)   |
| Rb2-Cl6 (x1) | 3.628(2)   | Rb2-Cl7 (x1) | 3.561(2)   |
| Cs1-Cl3 (x1) | 3.616(2)   | Cs1-Cl3 (x1) | 3.634(2)   |
| Cs1-Cl3 (x1) | 4.116(2)   | Cs1-Cl4 (x1) | 3.582(2)   |
| Cs1-Cl4 (x1) | 3.969(3)   | Cs1-Cl5 (x1) | 3.613(2)   |
| Cs1-Cl6 (x1) | 3.738(3)   | Cs1-Cl7 (x1) | 3.574(2)   |
| Cs1-Cl7 (x1) | 3.818(2)   | Cs1-Cl7 (x1) | 4.011(2)   |
| Bi1-Cl3 (x2) | 2.7133(19) | Bi1-Cl4 (x2) | 2.6703(18) |
| Bi1-Cl7 (x2) | 2.6981(19) | Bi2-Cl1 (x1) | 2.715(3)   |
| Bi2-Cl2 (x1) | 2.730(3)   | Bi2-Cl5 (x2) | 2.708(2)   |
| Bi2-Cl7 (x2) | 2.679(2)   |              |            |

**Table S4.** Selected bond angles (°) of Rb<sub>2</sub>CsBiCl<sub>6</sub> measured at RT.

|                  |            |                  |           |
|------------------|------------|------------------|-----------|
| Cl4-Bi1-Cl4 (x1) | 176.62(11) | Cl6-Bi2-Cl6 (x1) | 93.60(11) |
| Cl4-Bi1-Cl7 (x4) | 89.32(7)   | Cl6-Bi2-Cl5 (x2) | 85.31(8)  |
| Cl7-Bi1-Cl7(x1)  | 91.45(10)  | Cl6-Bi2-Cl5 (x2) | 178.90(7) |
| Cl4-Bi1-Cl3 (x2) | 93.59(7)   | Cl5-Bi2-Cl5 (x1) | 95.77(10) |
| Cl4-Bi1-Cl3 (x2) | 88.89(7)   | Cl6-Bi2-Cl1 (x2) | 90.46(7)  |
| Cl7-Bi1-Cl3 (x2) | 175.98(7)  | Cl5-Bi2-Cl1 (x2) | 89.35(7)  |
| Cl7-Bi1-Cl3 (x2) | 91.40(7)   | Cl6-Bi2-Cl2 (x2) | 89.96(7)  |
| Cl3-Bi1-Cl3 (x1) | 85.89(9)   | Cl5-Bi2-Cl2 (x2) | 90.24(7)  |
|                  |            | Cl1-Bi2-Cl2 (x1) | 179.39(9) |

**Table S5.** Molar ratios of  $M_{\text{Sb}^{3+}}/M_{(\text{Sb}^{3+}+\text{Bi}^{3+})}$  in solutions and in  $\text{Rb}_2\text{CsBiCl}_6:\text{Sb}^{3+}$  single crystals, respectively.

|                                                                                     |     |     |     |     |     |     |
|-------------------------------------------------------------------------------------|-----|-----|-----|-----|-----|-----|
| $M_{\text{Sb}^{3+}}/M_{(\text{Sb}^{3+}+\text{Bi}^{3+})}$ (%) in saturated solutions | 5   | 10  | 15  | 20  | 25  | 30  |
| $M_{\text{Sb}^{3+}}/M_{(\text{Sb}^{3+}+\text{Bi}^{3+})}$ (%) in single crystals     | 0.3 | 1.0 | 1.6 | 1.9 | 2.2 | 3.5 |

**Table S6.** Crystallographic and structure refinement data of Rb<sub>2</sub>CsBiCl<sub>6</sub> at 100 K.

|                                                                                                                      |                                                                    |
|----------------------------------------------------------------------------------------------------------------------|--------------------------------------------------------------------|
| Empirical formula                                                                                                    | Rb <sub>2</sub> CsBiCl <sub>6</sub>                                |
| Formula weight                                                                                                       | 725.53                                                             |
| Crystal system                                                                                                       | orthorhombic                                                       |
| Space group                                                                                                          | <i>Pbcm</i>                                                        |
| Cell dimensions/Å                                                                                                    | <i>a</i> = 8.0294(3), <i>b</i> = 12.7822(5), <i>c</i> = 25.7036(8) |
| Cell parameters /°                                                                                                   | $\alpha = \beta = \gamma = 90.00$                                  |
| Z                                                                                                                    | 8                                                                  |
| Cell Volume/Å <sup>3</sup>                                                                                           | 2638.05(16)                                                        |
| Calculated density (g/cm <sup>3</sup> )                                                                              | 3.654                                                              |
| Color                                                                                                                | colorless                                                          |
| F(000)                                                                                                               | 2512                                                               |
| $\mu/\text{mm}^{-1}$                                                                                                 | 24.578                                                             |
| Data collection range/deg                                                                                            | 2.556 < $\theta$ < 26.320                                          |
| Index ranges                                                                                                         | -10 ≤ <i>h</i> ≤ 8, -14 ≤ <i>k</i> ≤ 15, -29 ≤ <i>l</i> ≤ 32       |
| Data/restraints/parameters                                                                                           | 2752/0/97                                                          |
| GOF( <i>F</i> <sup>2</sup> )                                                                                         | 1.037                                                              |
| Final <i>R</i> indices [ <i>F</i> <sub>o</sub> <sup>2</sup> > 2σ( <i>F</i> <sub>c</sub> <sup>2</sup> )] <sup>a</sup> | <i>R</i> <sub>1</sub> = 0.0351, <i>wR</i> <sub>2</sub> = 0.0885    |
| Final <i>R</i> indices (all data) <sup>a</sup>                                                                       | <i>R</i> <sub>1</sub> = 0.0401, <i>wR</i> <sub>2</sub> = 0.0908    |

$$^a R_1 = \sum_2 \frac{||F_o| - |F_c||}{\sum |F_o|} \text{ and } wR_2 = \left[ \frac{\sum w(F_o^2 - F_c^2)}{\sum wF_o^4} \right]^{1/2} \text{ for } F_o^2 > 2\sigma(F_c^2)$$



**Table S7.** Cell parameters of  $\text{Rb}_2\text{CsBiCl}_6$  measured at 293(2) K and 100 K, respectively.

| Measured temperature | Space group | $a/\text{\AA}$ | $b/\text{\AA}$ | $c/\text{\AA}$ | $V/\text{\AA}^3$ |
|----------------------|-------------|----------------|----------------|----------------|------------------|
| 293(2) K             | <i>Pbcm</i> | 8.1044(4)      | 12.9295(6)     | 25.8508(10)    | 2708.8(2)        |
| 100 K                | <i>Pbcm</i> | 8.0294(3)      | 12.7822(5)     | 25.7036(8)     | 2638.05(16)      |

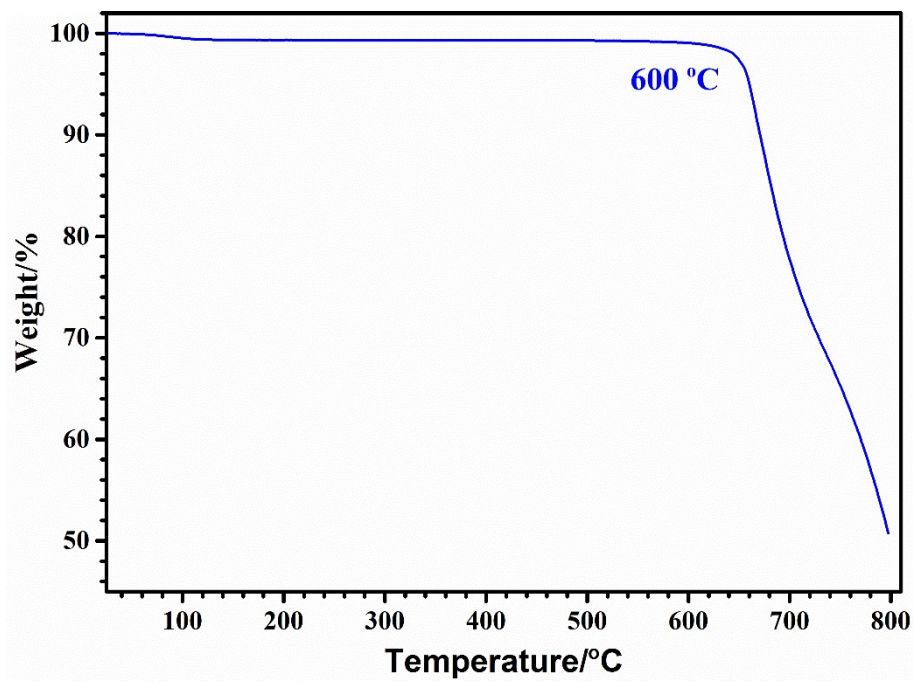

**Figure S1.** Thermal analysis curve of Rb<sub>2</sub>CsBiCl<sub>6</sub>.

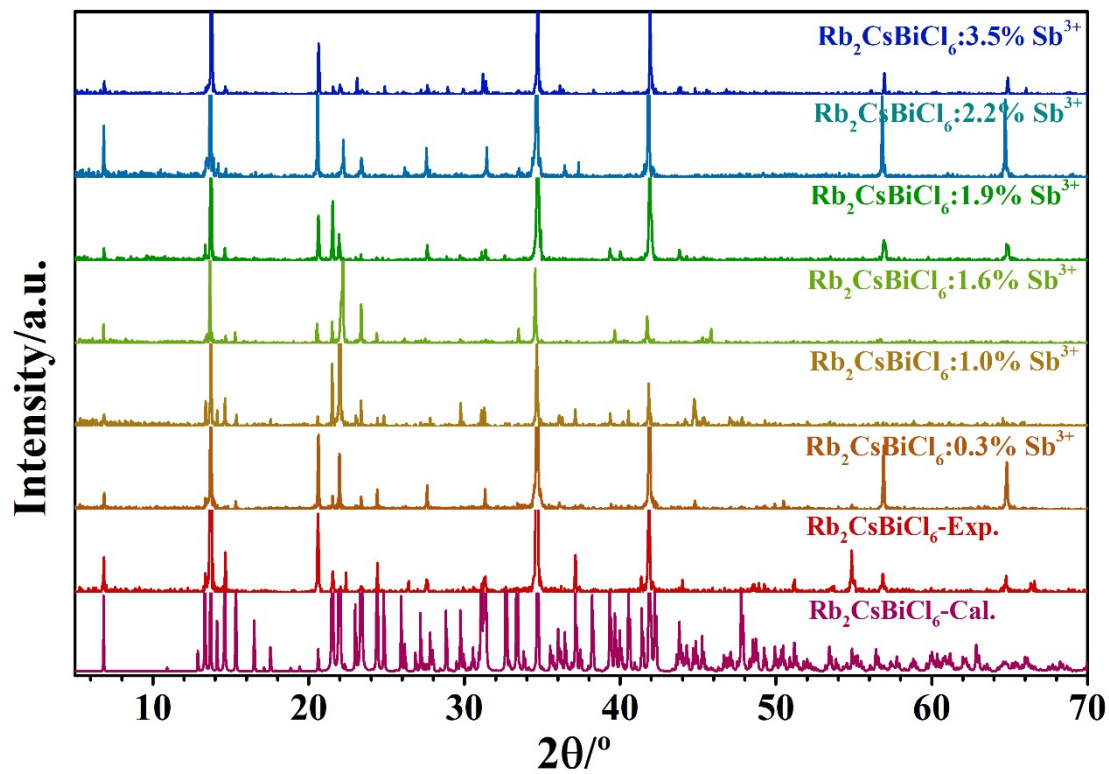

**Figure S2.** Calculated and experimental powder XRD patterns of undoped and  $\text{Sb}^{3+}$ -doped  $\text{Rb}_2\text{CsBiCl}_6$  (with  $M_{\text{Sb}^{3+}}/M_{(\text{Bi}^{3+}+\text{Sb}^{3+})}$  less than 30% in solutions).

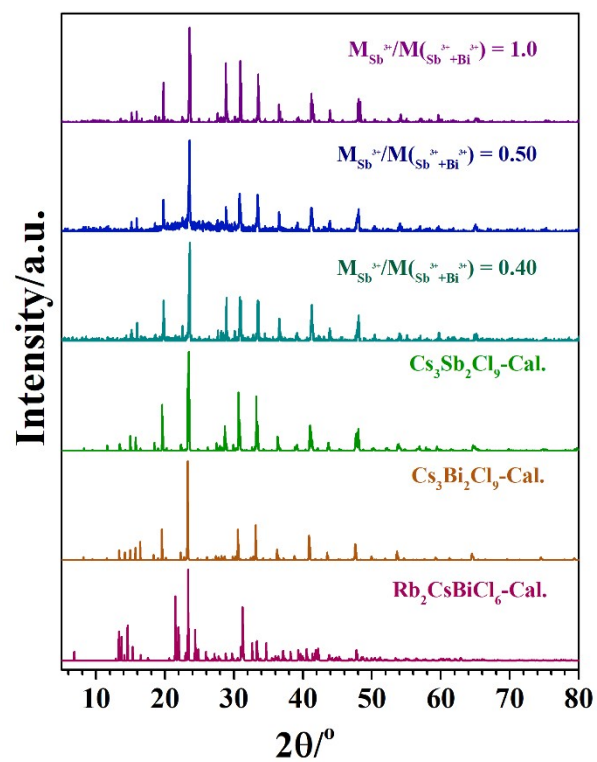

**Figure S3.** Calculated and experimental powder XRD patterns of undoped and  $\text{Sb}^{3+}$ -doped  $\text{Rb}_2\text{CsBiCl}_6$  (with  $M_{\text{Sb}^{3+}}/M_{(\text{Bi}^{3+}+\text{Sb}^{3+})}$  greater than 30% in solutions).

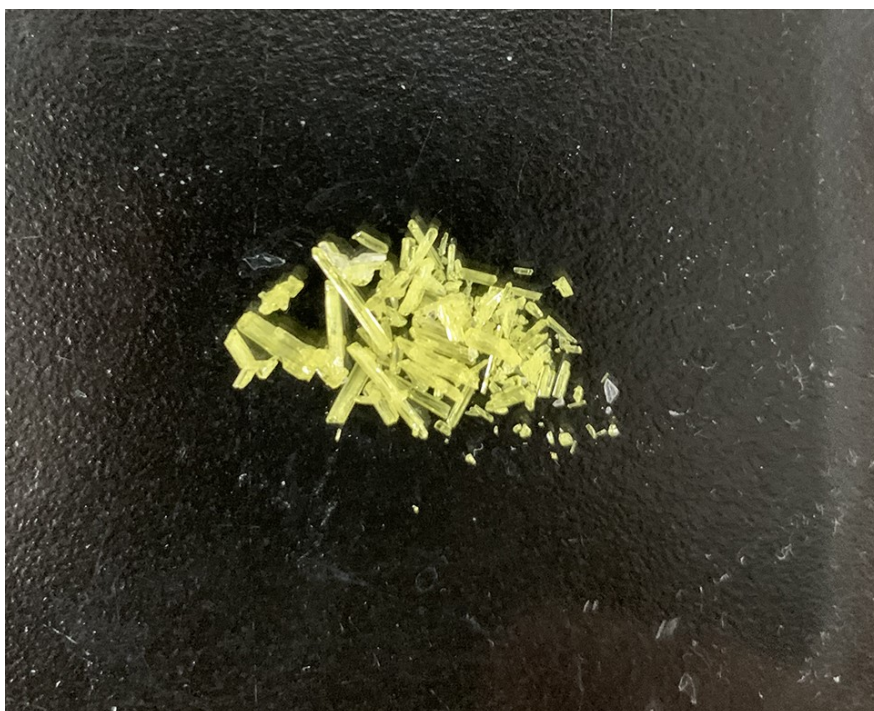

**Figure S4.** Photograph of crystals grown in a solution with  $M_{\text{Sb}^{3+}}/M_{(\text{Bi}^{3+}+\text{Sb}^{3+})}$  of 40%.

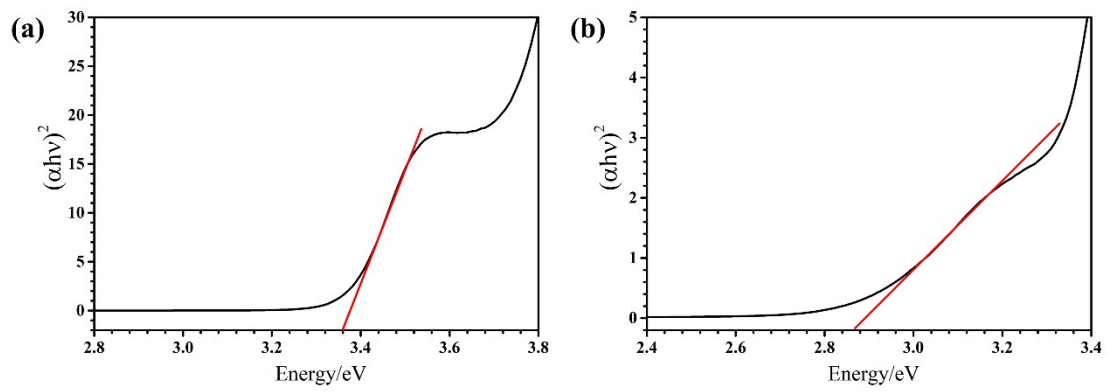

**Figure S5.** (a) Tauc plots of  $\text{Rb}_2\text{CsBiCl}_6$ , and (b)  $\text{Rb}_2\text{CsBiCl}_6:\text{Sb}^{3+}$  samples.

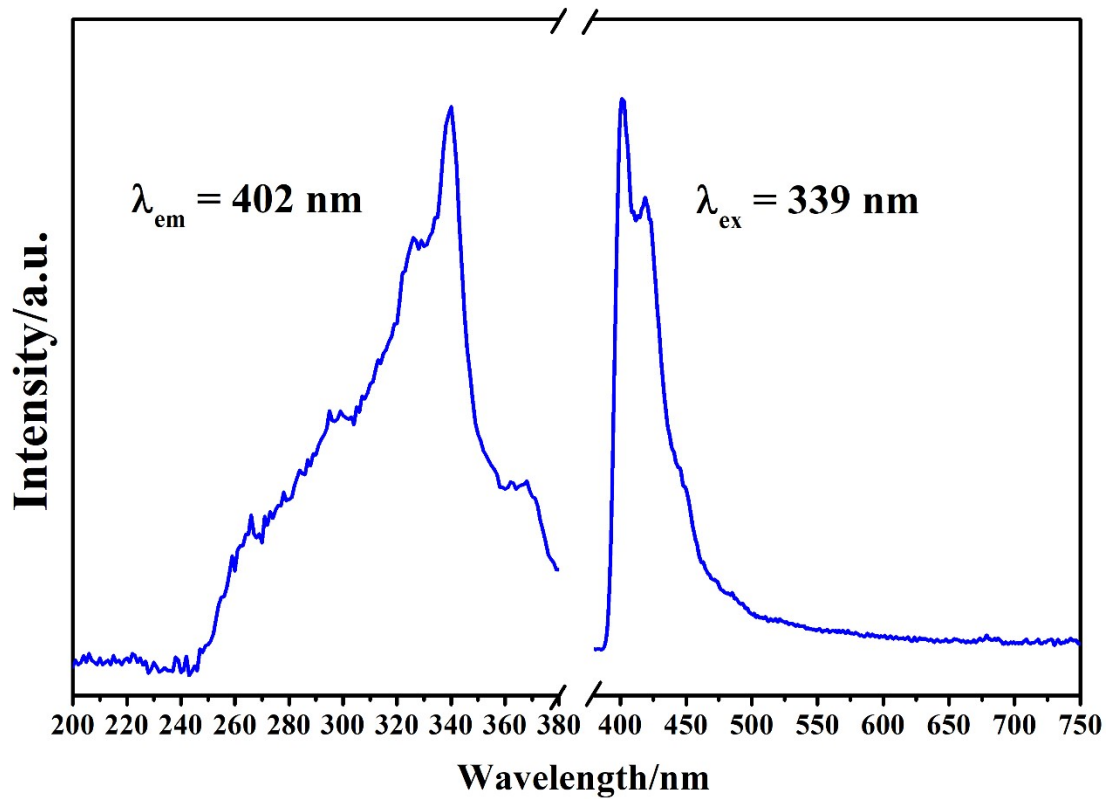

**Figure S6.** Excitation and emission spectra of the  $\text{Rb}_2\text{CsBiCl}_6$ .

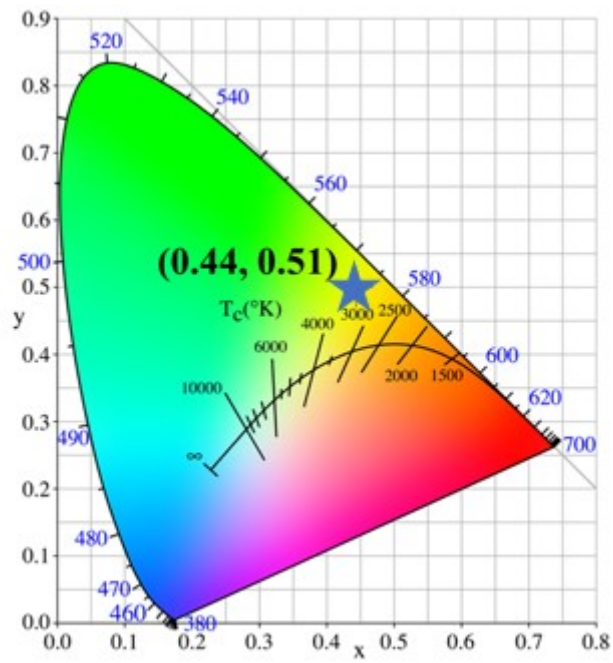

**Figure S7.** Calculated CIE chromaticity coordinates of  $\text{Sb}^{3+}$ -doping  $\text{Rb}_2\text{CsBiCl}_6$ .



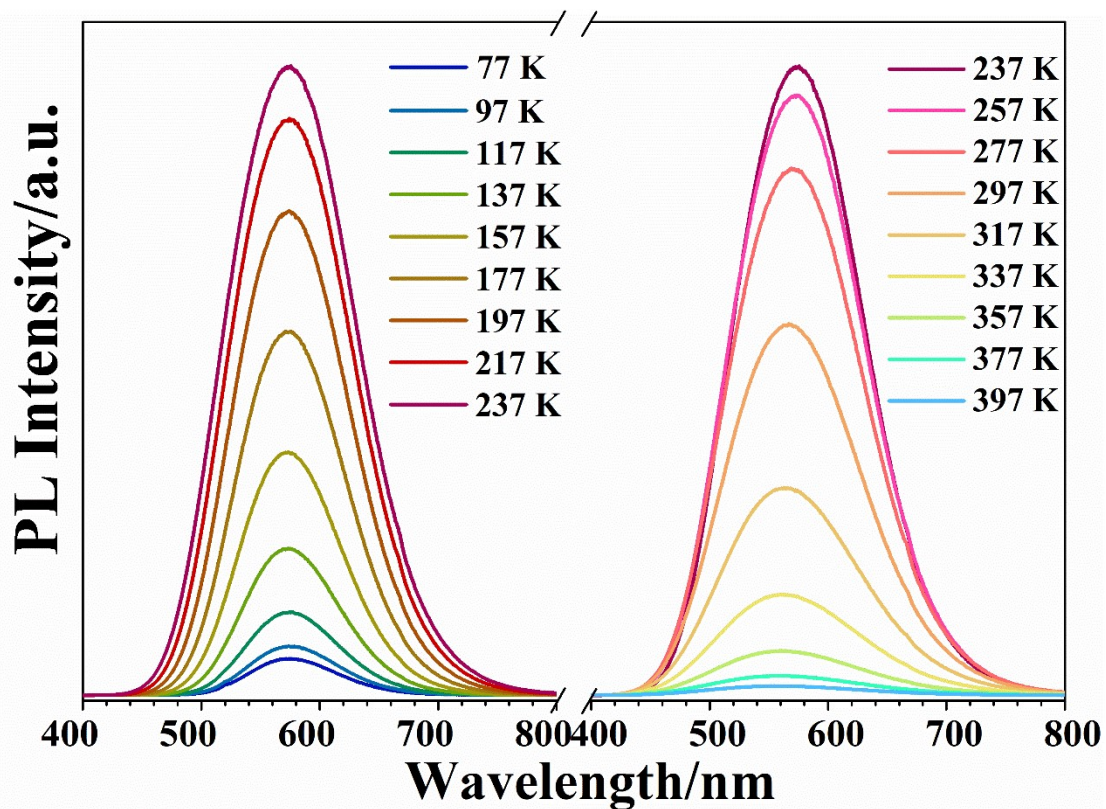

Figure S8. Normalized temperature-dependent emission spectra.

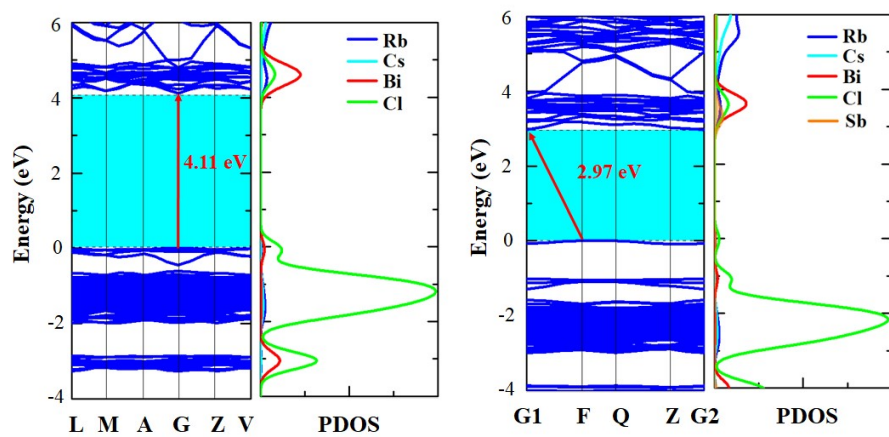

Figure S9. Calculated band gap and PDOS for undoped and  $\text{Sb}^{3+}$ -doped  $\text{Rb}_2\text{CsBiCl}_6$ .
